# Supplementary material
Source: PubMed Central journal article supplement (PMC4074058)
Supplement: NIHMS58504-supplement-1.pdf [file NIHMS58504-supplement-1.pdf]

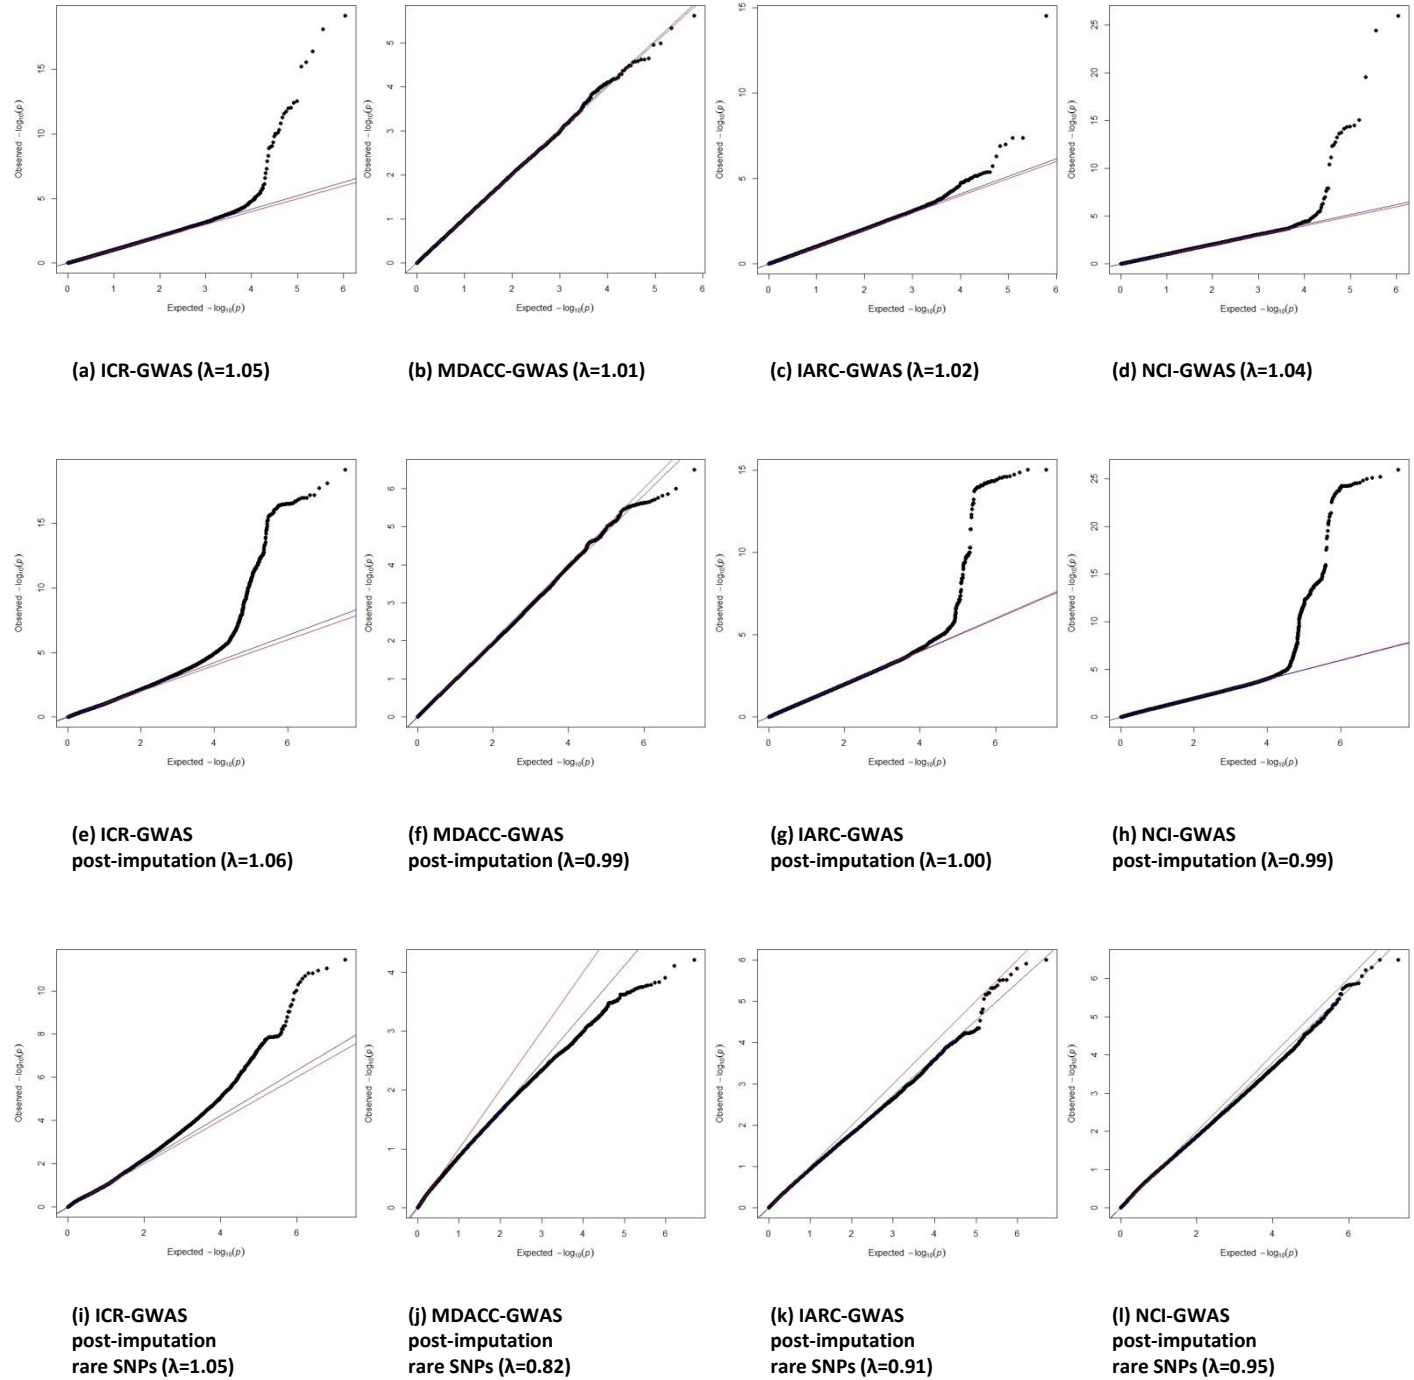

**Supplementary Figure 1: Q-Q plots of Cochran-Armitage trend test statistics for association based on 11,348 cases and 15,861 controls from discovery phase GWAS pre-imputation (a-d); all SNPs post-imputation (e-h) and rare SNPs post-imputation (i-l).**

**Supplementary Table 1: (a) Study participants**

| Subgroups      |                     | Discovery phase |          |       |          |       |          |       |          | Replication phase |          |         |          |                 |          |       |          |         |          | Overall |       |        |          |
|----------------|---------------------|-----------------|----------|-------|----------|-------|----------|-------|----------|-------------------|----------|---------|----------|-----------------|----------|-------|----------|---------|----------|---------|-------|--------|----------|
|                |                     | IARC            |          | MDACC |          | NCI   |          | ICR   |          | deCODE            |          | Harvard |          | Heidelberg-EPIC |          | IARC  |          | Toronto |          | ICR     |       | Cases  | Controls |
|                |                     | Cases           | Controls | Cases | Controls | Cases | Controls | Cases | Controls | Cases             | Controls | Cases   | Controls | Cases           | Controls | Cases | Controls | Cases   | Controls |         |       |        |          |
| ALL            |                     | 2,533           | 3,791    | 1,150 | 1,134    | 5,713 | 5,736    | 1,952 | 5,200    | 1,319             | 26,380   | 984     | 970      | 1,362           | 1,253    | 3,049 | 5,737    | 1,084   | 966      | 2,448   | 2,989 | 21,594 | 54,156   |
| Gender         | Male                | 1,900           | 2,549    | 655   | 644      | 4,464 | 4,837    | 1,166 | n/a      | 638               | 11,511   | 507     | 442      | 1,030           | 956      | 2,128 | 3,302    | 546     | 487      | 1,664   | 1,469 | 14,698 | 26,197   |
|                | Female              | 633             | 1,242    | 495   | 490      | 1,249 | 899      | 786   | n/a      | 681               | 14,869   | 477     | 528      | 332             | 297      | 919   | 2,415    | 534     | 479      | 784     | 1,520 | 6,890  | 22,739   |
| Smoking        | Never               | 159             | 1,253    | n/a   | n/a      | 350   | 1,379    | 109   | 5,200    | 55                | 1,100    | 92      | 161      | 114             | 474      | 364   | 1,861    | 124     | 468      | 129     | 555   | 1,496  | 12,451   |
|                | Former              | 449             | 891      | 572   | 626      | 1,927 | 2,001    | 762   | 5,200    | n/a               | n/a      | 502     | 555      | 475             | 544      | 482   | 1,084    | 495     | 414      | 1,724   | 587   | 7,388  | 11,902   |
|                | Current             | 1,814           | 1,513    | 578   | 508      | 3,415 | 2,335    | 1,065 | 5,200    | n/a               | n/a      | 390     | 254      | 697             | 235      | 1,378 | 1,678    | 426     | 68       | 537     | 343   | 10,300 | 12,134   |
|                | Ever                | 2,367           | 2,508    | 1,150 | 1,134    | 5,347 | 4,349    | 1,843 | 5,200    | 1,018             | 20,360   | 892     | 809      | 1,172           | 779      | 748   | n/a      | 947     | 492      | 2,261   | 930   | 17,745 | 36,561   |
| Age            | ≤ 50                | 319             | 1,051    | 193   | 137      | 101   | 124      | n/a   | n/a      | 71                | 1,934    | 81      | 214      | 25              | 49       | 1,209 | 2,619    | 77      | 165      | 35      | 473   | 2,111  | 6,766    |
|                | > 50                | 2,214           | 2,737    | 957   | 997      | 5,612 | 5,612    | n/a   | n/a      | 1,245             | 24,446   | 903     | 756      | 1,337           | 1,204    | 1,836 | 3,098    | 1,004   | 801      | 2,413   | 2,516 | 17,521 | 42,167   |
| Histology      | AD                  | 517             | 2,824    | 619   | 1,134    | 1,841 | 5,736    | 465   | 5,200    | 547               | 26,380   | 488     | 970      | 554             | 1,253    | 919   | 5,737    | 649     | 966      | 432     | 2,989 | 7,031  | 53,189   |
|                | SQ                  | 911             | 2,968    | 306   | 1,134    | 1,447 | 5,736    | 611   | 5,200    | 259               | 26,380   | 215     | 970      | 345             | 1,253    | 1,121 | 5,737    | 206     | 966      | 1,056   | 2,989 | 6,477  | 53,333   |
|                | SCLC                | 388             | 2,968    | n/a   | n/a      | 706   | 5,736    | 530   | 5,200    | 193               | 26,380   | n/a     | n/a      | 274             | 1,253    | 299   | 5,737    | 77      | 966      | 506     | 2,989 | 2,973  | 51,229   |
|                | LCLC                | 40              | 2,968    | n/a   | n/a      | 170   | 5,736    | n/a   | n/a      | 42                | 26,380   | 81      | 970      | 42              | 1,253    | 96    | 5,737    | 37      | 966      | 0       | 2,989 | 508    | 46,999   |
|                | NSCLC               | n/a             | n/a      | n/a   | n/a      | n/a   | n/a      | 1,420 | 5,200    | n/a               | n/a      | n/a     | n/a      | 1,012           | 1,253    | n/a   | n/a      | 76      | 966      | 1,909   | 2,989 | 4,417  | 10,408   |
|                | other               | 677             | 2,127    | 224   | 1,134    | n/a   | n/a      | n/a   | n/a      | n/a               | n/a      | n/a     | n/a      | 34              | 1,253    | 592   | 5,737    | 36      | 966      | 33      | 2,989 | 1,596  | 14,206   |
| Stage          | I/II <sup>1</sup>   | n/a             | n/a      | 378   | 1,134    | 1,424 | 5,736    | 92    | 5,200    | n/a               | n/a      | 455     | 970      | 153             | 1,253    | 617   | 4,665    | n/a     | n/a      | n/a     | n/a   | 3,119  | 18,958   |
|                | III/IV <sup>1</sup> | n/a             | n/a      | 707   | 1,134    | 2,064 | 5,736    | 320   | 5,200    | n/a               | n/a      | 529     | 970      | 452             | 1,253    | 706   | 4,665    | n/a     | n/a      | n/a     | n/a   | 4,778  | 18,958   |
|                | limited stage       | n/a             | n/a      | n/a   | n/a      | n/a   | n/a      | 56    | 5,200    | n/a               | n/a      | n/a     | n/a      | n/a             | n/a      | n/a   | n/a      | n/a     | n/a      | n/a     | n/a   | 56     | 5,200    |
|                | extended            | n/a             | n/a      | n/a   | n/a      | n/a   | n/a      | 104   | 5,200    | n/a               | n/a      | n/a     | n/a      | n/a             | n/a      | 0     | n/a      | n/a     | n/a      | n/a     | n/a   | 104    | 5,200    |
| Family history | Yes                 | 130             | 93       | 241   | 167      | 782   | 554      | 285   | n/a      | n/a               | n/a      | 166     | 110      | n/a             | n/a      | 92    | 40       | 194     | 114      | n/a     | n/a   | 1,890  | 1,078    |
|                | No                  | 2,403           | 3,668    | 904   | 964      | 4,251 | 4,724    | 1,667 | n/a      | n/a               | n/a      | 817     | 860      | n/a             | n/a      | 2,079 | 2,079    | 890     | 852      | n/a     | n/a   | 13,011 | 13,147   |

**Supplementary Table 1: (b) Quality control of GWAS datasets**

| Quality Control exclusion criteria               | ICR-GWAS                                            |                | MDACC-GWAS    |                                                     |                                |              |
|--------------------------------------------------|-----------------------------------------------------|----------------|---------------|-----------------------------------------------------|--------------------------------|--------------|
| QC per individual                                | criteria                                            | Cases          | Controls      | criteria                                            | Cases                          | Controls     |
| samples attempted                                |                                                     | 1,978          | 5,200         |                                                     | 1177                           | 1176         |
| failed genotyping                                |                                                     | 20             | 0             |                                                     | 0                              | 0            |
| Missing rate per person                          | >5%                                                 | 0              | 0             | >5%                                                 | 5                              | 4            |
| X chromosome heterozygosity rate                 | >20% for men and < 20%<br>for women                 | 6              | 0             | >20% for men and < 20%<br>for women                 | 3                              | 6            |
| Unexpected duplicates and first degree relatives | duplicate ID, genome-wide<br>IBD proportion > 0.185 | 0              | 0             | duplicate ID, genome-wide<br>IBD proportion > 0.185 | 4                              | 13           |
| Autosomal heterozygosity rate                    | >6 SD of the mean                                   | 0              | 0             | >6 SD of the mean                                   | 4                              | 3            |
| None European ancestry                           | Non CEU                                             | 0              | 0             | Non CEU                                             | 5                              | 7            |
| other                                            |                                                     | 0              | 0             |                                                     | 6                              | 9            |
| <b>samples post QC</b>                           |                                                     | <b>1,952</b>   | <b>5,200</b>  |                                                     | <b>1,150</b>                   | <b>1,134</b> |
| <b>SNP QC</b>                                    |                                                     |                |               |                                                     |                                |              |
| genotyping array                                 |                                                     | Illumina 550k  | Illumina 1.2M |                                                     | Illumina 300K<br>HumanHap v1.1 |              |
| SNPs attempted                                   |                                                     | 552,947        | 888,268       |                                                     |                                |              |
| SNPs attempted in both cases and controls        |                                                     | 499,432        |               |                                                     | 317,498                        |              |
| Test of missingness by case-control status       |                                                     | 0              |               |                                                     | n/a                            |              |
| Genotyped call rate                              | <0.95                                               | 47             |               | <0.95                                               | 1638                           |              |
| Monomorphic in CEU                               |                                                     | 0              |               |                                                     | 410                            |              |
| MAF                                              | <0.01                                               | 0              |               | <0.01                                               | 584                            |              |
| HWE                                              | <1x10 <sup>-4</sup>                                 | 642            |               | <1x10 <sup>-4</sup>                                 | 639                            |              |
| <b>Total number of SNPs post QC</b>              |                                                     | <b>498,744</b> |               |                                                     | <b>314,227</b>                 |              |

| Quality Control exclusion criteria               | IARC-GWAS                                            |                  |                  |                    |                  |                  |                    |                  |                  |                          |                  |
|--------------------------------------------------|------------------------------------------------------|------------------|------------------|--------------------|------------------|------------------|--------------------|------------------|------------------|--------------------------|------------------|
|                                                  |                                                      | Central Europe   |                  | CARET <sup>2</sup> |                  | Estonia          |                    | France           |                  | Hunt/Tromso <sup>3</sup> |                  |
| QC per individual                                | criteria                                             | Cases            | Controls         | Cases              | Controls         | Cases            | Controls           | Cases            | Controls         | Cases                    | Controls         |
| samples attempted                                |                                                      | 1,841            | 2,441            | 397                | 393              | 109              | 875                | 135              | 146              | 403                      | 412              |
| failed genotyping                                |                                                      | 0                | 0                | 0                  | 0                | 0                | 0                  | 0                | 0                | 0                        | 0                |
| Missing rate per person                          | >5%                                                  | 224              | 278              | 32                 | 36               | 2                | 1                  | 5                | 0                | 33                       | 24               |
| X chromosome heterozygosity rate                 | >10% for men and<br>< 20% for women                  | 2                | 3                | 2                  | 1                | 0                | 1                  | 1                | 0                | 4                        | 3                |
| Unexpected duplicates and first degree relatives | duplicate ID,<br>genome-wide IBD<br>proportion > 0.2 | 3                | 7                | 0                  | 1                | 1                | 46                 | 0                | 2                | 13                       | 15               |
| Autosomal heterozygosity rate                    | >6 SD of the mean                                    | 3                | 7                | 1                  | 0                | 0                | 3                  | 1                | 0                | 0                        | 0                |
| None European ancestry                           | Ancestry<br>probability being<br>CEU <80%            | 3                | 4                | 0                  | 0                | 0                | 1                  | 0                | 0                | 0                        | 3                |
| other                                            |                                                      | 10               | 15               | 0                  | 0                | 0                | 0                  | 1                | 0                | 11                       | 24               |
| <b>samples post QC</b>                           |                                                      | <b>1,596</b>     | <b>2,127</b>     | <b>362</b>         | <b>354</b>       | <b>106</b>       | <b>823</b>         | <b>127</b>       | <b>144</b>       | <b>342</b>               | <b>343</b>       |
| <b>SNP QC</b>                                    |                                                      |                  |                  |                    |                  |                  |                    |                  |                  |                          |                  |
| genotyping array                                 |                                                      | Illumina<br>317k | Illumina<br>317k | Illumina<br>317k   | Illumina<br>317k | Illumina<br>317k | Illumina<br>370Duo | Illumina<br>317k | Illumina<br>317k | Illumina<br>317k         | Illumina<br>370k |
| SNPs attempted                                   |                                                      | 318,237          | 318,237          | 318,237            | 318,237          | 318,237          | 370,404            | 318,237          | 318,237          | 318,237                  | 318,237          |
| SNPs attempted in both cases and controls        |                                                      | 311,129          |                  | 311,129            |                  | 311,129          |                    | 311,129          |                  | 311,129                  |                  |
| Test of missingness by case-control status       |                                                      | 25               |                  | 0                  |                  | 73               |                    | 624              |                  | 1,879                    |                  |
| Genotyped call rate                              | <0.95                                                | 11,986           |                  | 12,903             |                  | 11806            |                    | 19,480           |                  | 16,556                   |                  |
| Strand issue                                     |                                                      | 21               |                  | 21                 |                  | 21               |                    | 21               |                  | 21                       |                  |
| MAF                                              | <0.01                                                | n/a              |                  | n/a                |                  | n/a              |                    | n/a              |                  | n/a                      |                  |
| HWE                                              | <1x10 <sup>-4</sup>                                  | 342              |                  | 14                 |                  | 114              |                    | 503              |                  | 30                       |                  |
| <b>Total number of SNPs post QC</b>              |                                                      | <b>298,776</b>   |                  | <b>289,938</b>     |                  | <b>299,136</b>   |                    | <b>290,727</b>   |                  | <b>292,664</b>           |                  |

| Quality Control exclusion criteria               | NCI-GWAS                                                  |                    |                                       |
|--------------------------------------------------|-----------------------------------------------------------|--------------------|---------------------------------------|
| <b>Quality controls per individual</b>           |                                                           |                    |                                       |
|                                                  | criteria                                                  | Cases              | Controls                              |
| samples attempted <sup>4</sup>                   |                                                           | 6,045              | 6,542                                 |
| failed genotyping                                |                                                           | 0                  | 0                                     |
| Missing rate per person                          | >5%                                                       | 188                | 288                                   |
| X chromosome heterozygosity rate                 | >0.5% for men and < 20%<br>or >35% for women <sup>5</sup> | 32                 | 24                                    |
| Unexpected duplicates and first degree relatives | genotype concordance ><br>98%                             | 51                 | 38                                    |
| Autosomal heterozygosity rate                    | >34%                                                      | 2                  | 0                                     |
| None European ancestry                           | Estimated CEU admixture<br><80%                           | 16                 | 2                                     |
| other                                            |                                                           | 52                 | 456                                   |
| <b>samples post QC</b>                           |                                                           | <b>5,713</b>       | <b>5,736</b>                          |
| <b>Quality controls per SNP</b>                  |                                                           |                    |                                       |
| genotyping array                                 |                                                           | Illumina 550k/610k | Illumina 550k/610k<br>/317k+240S/1M   |
| SNPs attempted                                   |                                                           | 561,466/620,901    | 561,466/620,901<br>/561,494/1,192,887 |
| SNPs attempted in both cases and controls        |                                                           | 599,947            |                                       |
| Test of missingness by case-control status       |                                                           | 0                  |                                       |
| Genotyped call rate                              | <0.95                                                     | 79,420             |                                       |
| MAF (including monomorphic)                      | <0.001                                                    | 19,437             |                                       |
| HWE                                              | <1x10 <sup>-6</sup>                                       | 15,930             |                                       |
| other                                            |                                                           | 183                |                                       |
| <b>SNPs post QC</b>                              |                                                           | <b>505,770</b>     |                                       |

**Supplementary Table 1: (c) details of imputation applied to each GWAS dataset.**

|                                         | <b>IARC</b>                                                | <b>MDACC</b>                                               | <b>NCI</b>                                                 | <b>UK</b>                                                  |
|-----------------------------------------|------------------------------------------------------------|------------------------------------------------------------|------------------------------------------------------------|------------------------------------------------------------|
| <b>Imputation software</b>              | minimac                                                    | MaCH1.0                                                    | IMPUTE II                                                  | IMPUTE II                                                  |
| <b>Reference panel</b>                  | 1000Genome<br>(Phase 1<br>integrated release<br>version 3) |
| <b>Program for association analysis</b> | mach2dat                                                   | ProbABEL                                                   | R (glm function)                                           | SNPTEST                                                    |
| <b>Size of inference panel</b>          | 289,938 - 299,136 <sup>‡</sup>                             | 314,227                                                    | 505,770                                                    | 498,744                                                    |
| <b>Number of SNPs imputed*</b>          | 10,728,367                                                 | 10,751,467                                                 | 18,330,772                                                 | 18,378,912                                                 |
| <1%                                     | 2,340,682 (21.8%)                                          | 2,357,454 (21.9%)                                          | 9,665,685 (52.7%)                                          | 9,121,221 (49.6%)                                          |
| 1-5%                                    | 2,173,927 (20.3%)                                          | 2,165,097 (20.1%)                                          | 2,483,010 (13.6%)                                          | 2,761,148 (15.0%)                                          |
| >5%                                     | 6,213,736 (57.9%)                                          | 6,228,916 (58.0%)                                          | 6,182,077 (33.7%)                                          | 6,496,543 (35.4%)                                          |

<sup>1</sup>Stage for NSCLC

<sup>2</sup>Carotene and Retinol Efficacy Trial cohort.

<sup>3</sup>North Trondelag Health Study 2 / Tromsø IV

<sup>4</sup>This includes 241 duplicate samples

<sup>5</sup>With exceptions of ATBC study in which the exclusion criterion is >1.2% for men and CPSII controls genotyped on 1M array for which exclusion criteria of either <18% or >26% is used for women

\* Numbers presented are those passed the post-imputation quality controls; ‡ Numbers based on 5 series

**Supplementary Table 2: Tables of the odds ratios of lung cancer associated with 13q13.1 (rs11571833 and rs56084662), 22q12.1 (rs17879961) and 3q28 (rs13314271) risk loci (a-l).** All lung cancer based on 21,594 lung cancer cases and 54,156 controls (a-d), SQ based on 6,477 SQ and 53,333 controls (e-h) and AD based on 7,031 AD and 53,189 controls (i-l). Studies are weighted according to the inverse of the variance of the log of the OR calculated by unconditional logistic regression. *Horizontal lines*: 95% confidence intervals (95% CI). *Box*: OR point estimate; its area is proportional to the weight of the study. *Diamond (and broken line)*: overall summary estimate, with confidence interval given by its width. *Unbroken vertical line*: at the null value (OR = 1.0).

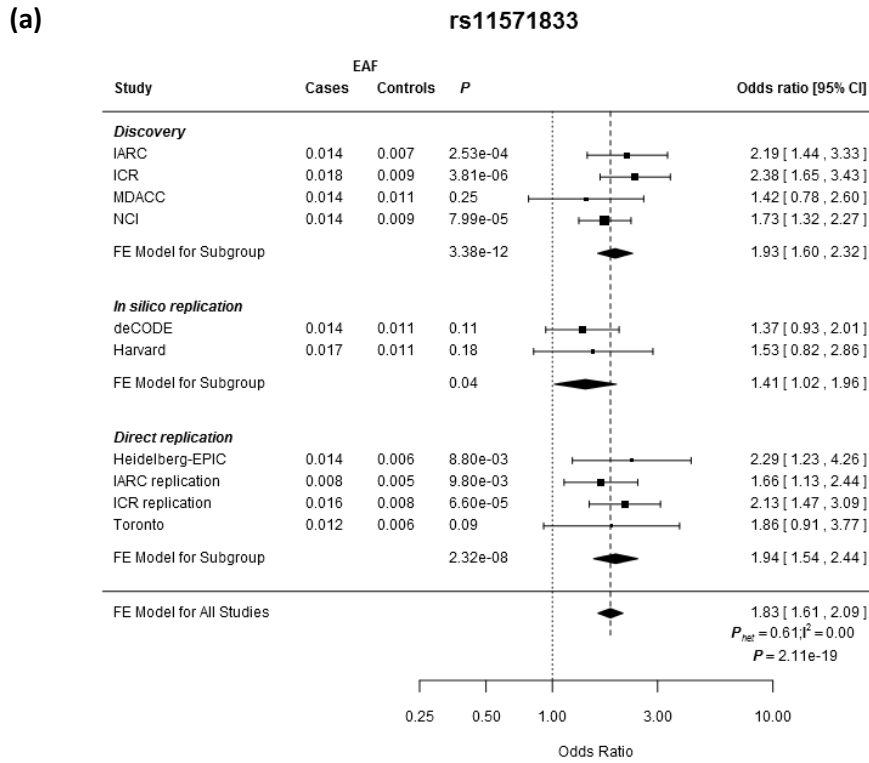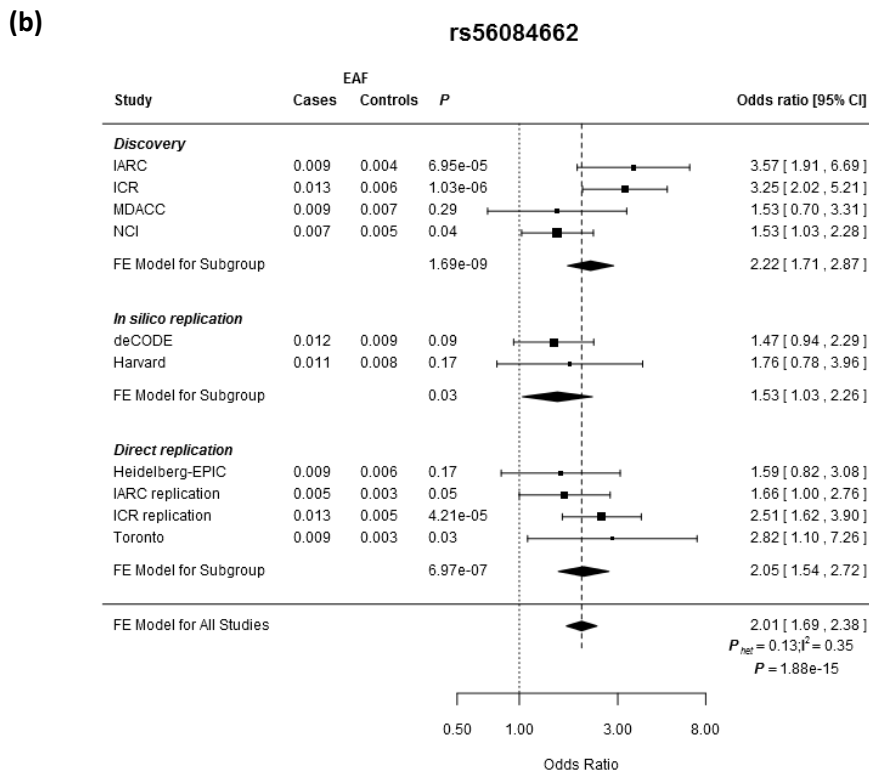

(c)

rs17879961

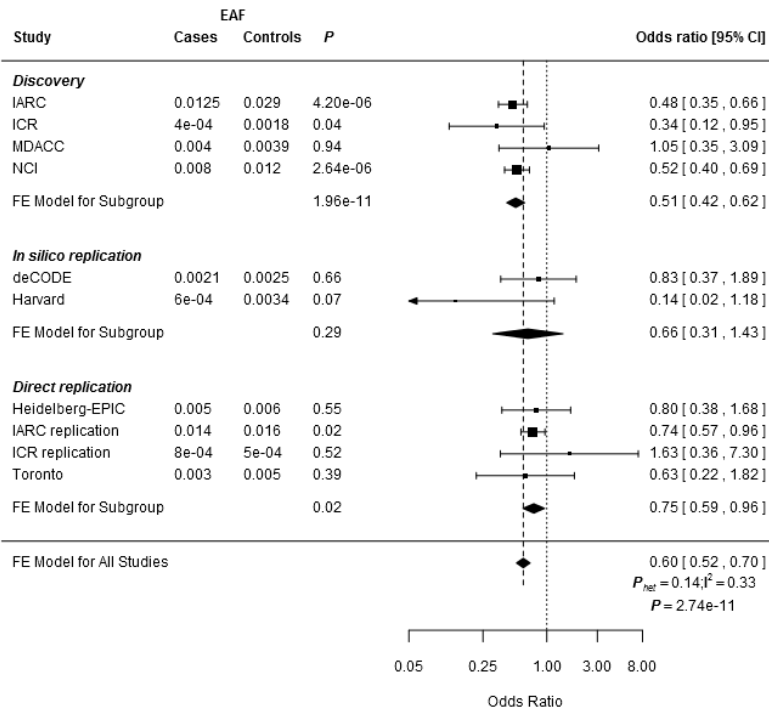

(d)

rs13314271

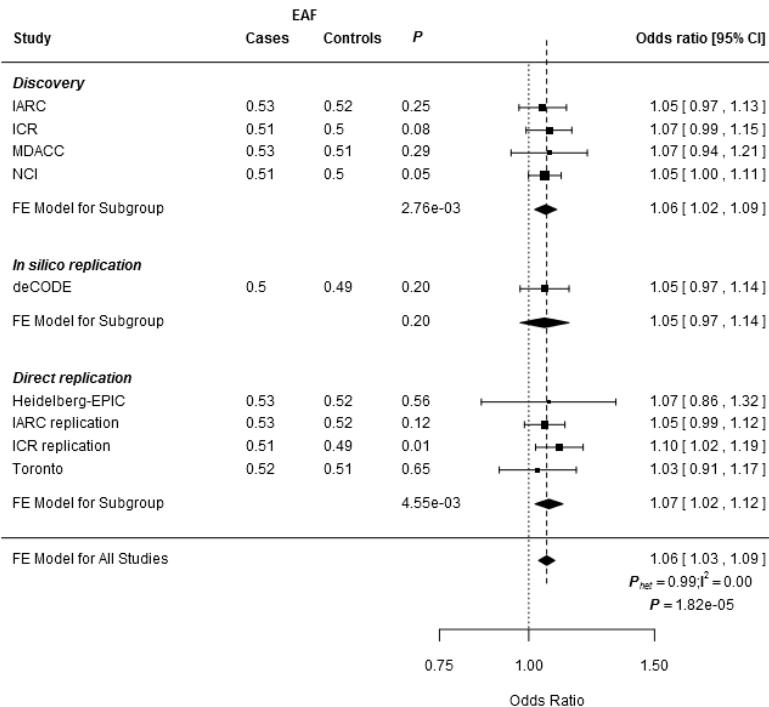



(e)

rs11571833

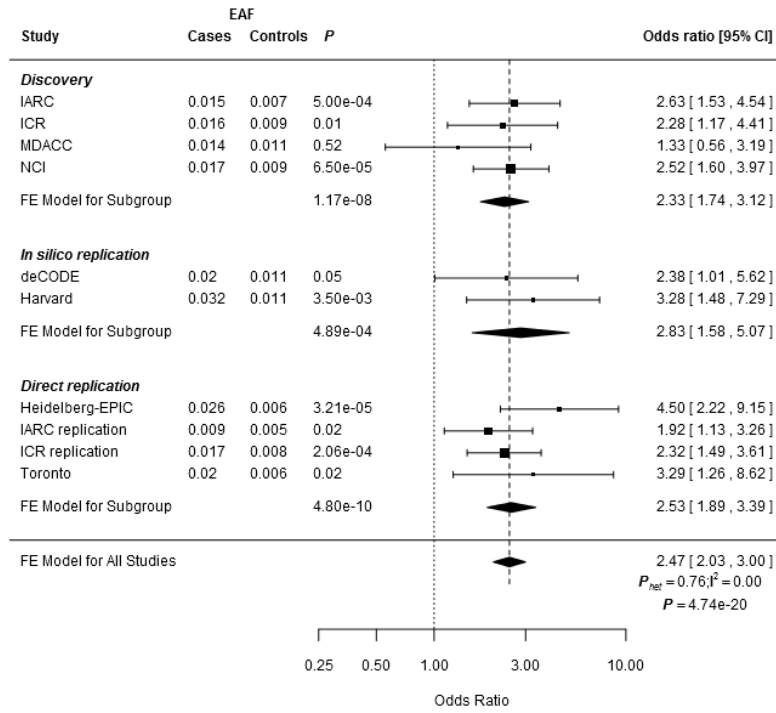

(f)

rs56084662

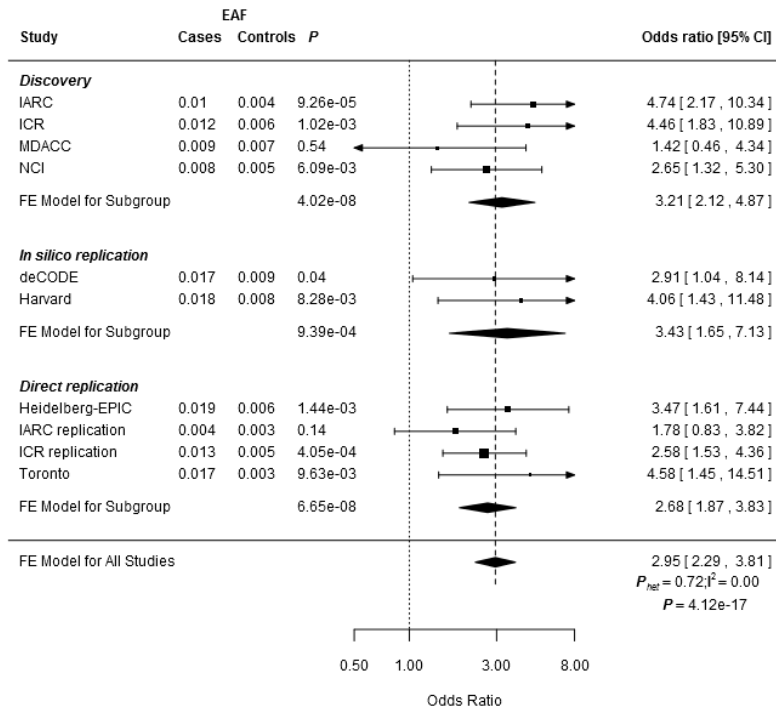

(g)

rs17879961

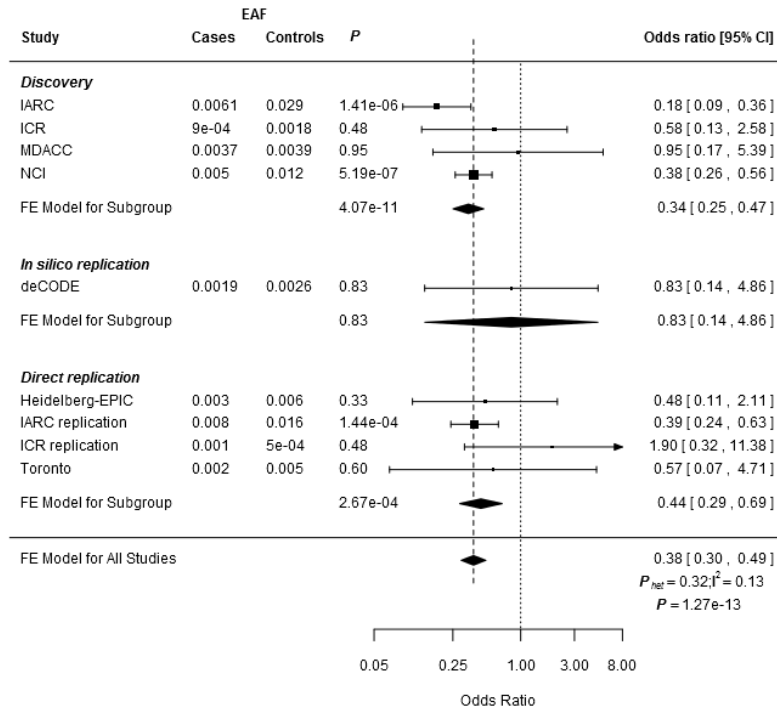

(h)

rs13314271

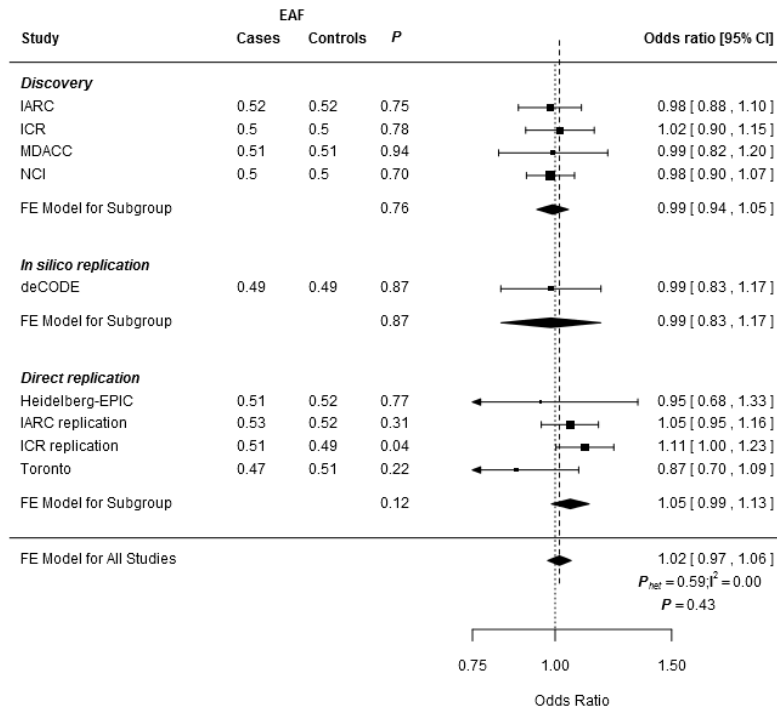

(i)

rs11571833

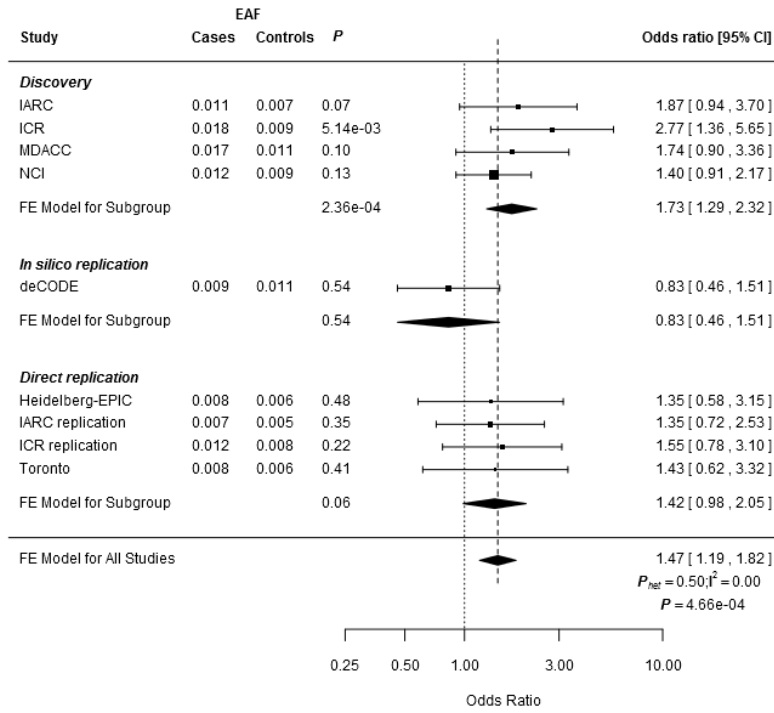

(j)

rs56084662

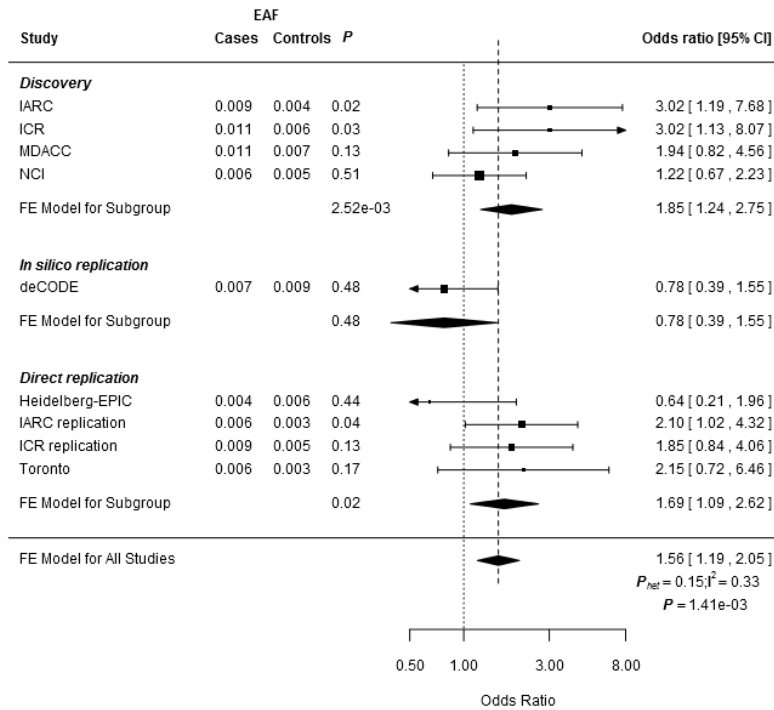

(k)

rs17879961

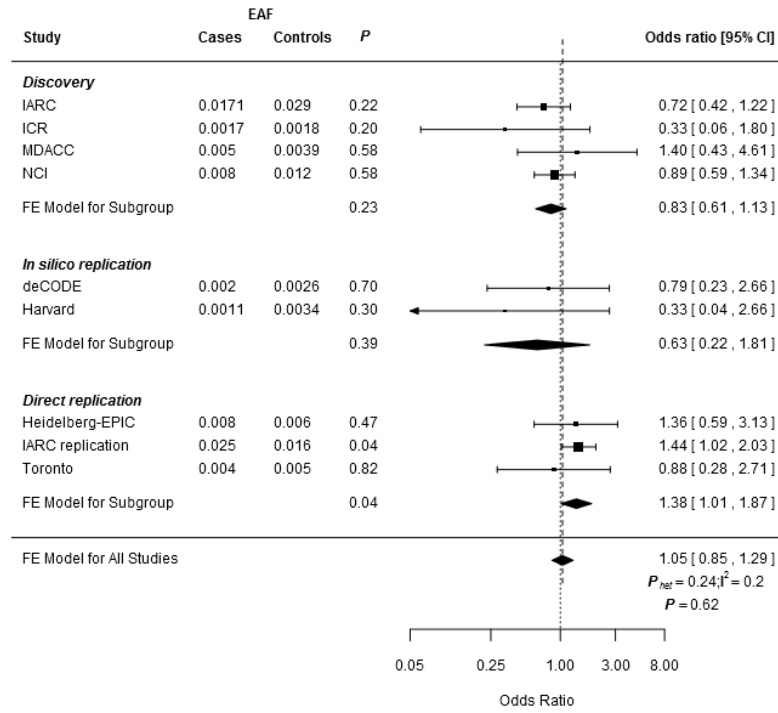

(l)

rs13314271

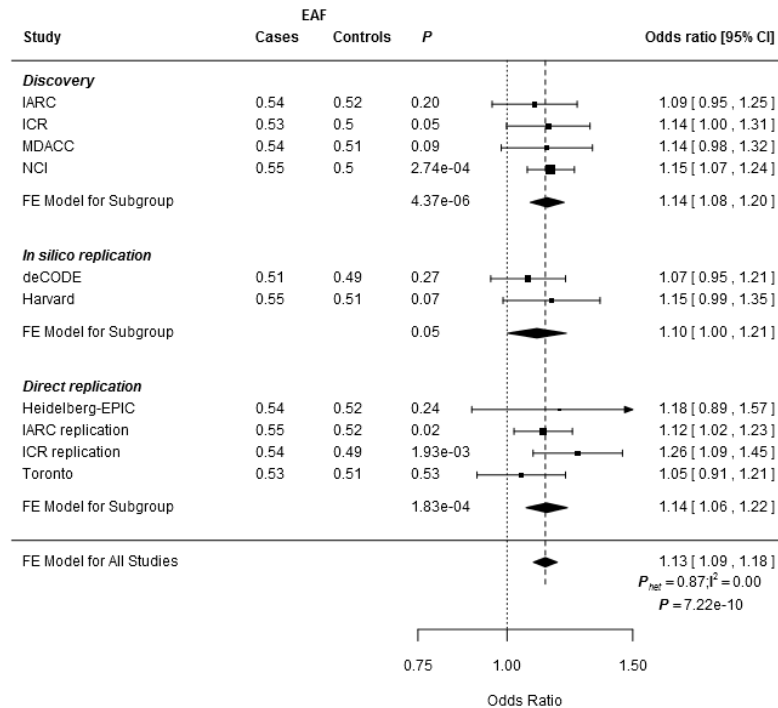

**Supplementary Table 4: Association between *BRCA2*-K3326X and *CHEK2*-I157T genotype and lung cancer risk by country of origin.**

**a) *BRCA2*-K3326X (rs11571833) and risk of all lung cancer**

| Study                        | Country         | EAF   |          | Size  |          | OR   | 95% CI     | P                                                                       |
|------------------------------|-----------------|-------|----------|-------|----------|------|------------|-------------------------------------------------------------------------|
|                              |                 | Cases | Controls | Cases | Controls |      |            |                                                                         |
| <b>Discovery</b>             |                 |       |          |       |          |      |            |                                                                         |
| IARC                         | Romania         | 0.006 | 0.009    | 75    | 116      | 0.84 | 0.04-16.38 | 0.91                                                                    |
|                              | Hungary         | 0.011 | 0.01     | 223   | 219      | 1.08 | 0.24-4.82  | 0.92                                                                    |
|                              | Poland          | 0.01  | 0.003    | 543   | 635      | 4.18 | 1.02-17.16 | 0.05                                                                    |
|                              | Russia          | 0.017 | 0.007    | 318   | 622      | 3.34 | 1.21-9.25  | 0.02                                                                    |
|                              | Slovakia        | 0.021 | 0.023    | 273   | 156      | 0.84 | 0.31-2.30  | 0.73                                                                    |
|                              | Czech Republic  | 0.021 | 0.004    | 164   | 379      | 8.50 | 1.67-43.25 | 9.95×10 <sup>-3</sup>                                                   |
|                              | France          | 0.01  | 0.006    | 127   | 144      | 1.89 | 0.16-21.68 | 0.61                                                                    |
|                              | USA             | 0.017 | 0.009    | 362   | 354      | 2.20 | 0.75-6.55  | 0.15                                                                    |
|                              | Norway          | 0.012 | 0.008    | 342   | 343      | 1.65 | 0.48-5.70  | 0.43                                                                    |
|                              | Estonia         | 0.005 | 0.006    | 106   | 823      | 1.19 | 0.13-11.35 | 0.88                                                                    |
| NCI                          | Finland         | 0.018 | 0.007    | 1,732 | 1,270    | 2.69 | 1.48-4.91  | 1.17×10 <sup>-3</sup>                                                   |
|                              | Italy           | 0.015 | 0.011    | 1,917 | 1,978    | 1.56 | 0.99-2.46  | 0.06                                                                    |
|                              | USA             | 0.01  | 0.008    | 2,064 | 2,488    | 1.42 | 0.86-2.35  | 0.17                                                                    |
| UK                           | UK              | 0.018 | 0.009    | 1,952 | 5,200    | 2.38 | 1.65-3.43  | 3.81×10 <sup>-6</sup>                                                   |
| USA                          | MDACC           | 0.014 | 0.011    | 1,150 | 1,134    | 1.42 | 0.77-2.59  | 0.25                                                                    |
| FE Model for Subgroup        |                 |       |          |       |          | 1.9  | 1.57-2.30  | 5.66×10 <sup>-11</sup><br>P <sub>het</sub> =0.38; I <sup>2</sup> =6.40% |
| <b>In silico replication</b> |                 |       |          |       |          |      |            |                                                                         |
| deCODE                       | Iceland         | 0.014 | 0.011    | 1319  | 26380    | 1.37 | 0.93-2.01  | 0.11                                                                    |
| Harvard                      | USA             | 0.017 | 0.011    | 984   | 970      | 1.53 | 0.82-2.86  | 0.18                                                                    |
| FE Model for Subgroup        |                 |       |          |       |          | 1.41 | 1.02-1.96  | 0.04<br>P <sub>het</sub> =0.76; I <sup>2</sup> =0%                      |
| <b>Direct replication</b>    |                 |       |          |       |          |      |            |                                                                         |
| IARC                         | Denmark         | 0.005 | 0.005    | 279   | 721      | 1.11 | 0.28-4.32  | 0.88                                                                    |
|                              | France          | 0.043 | 0.012    | 23    | 42       | 3.90 | 0.33-45.59 | 0.28                                                                    |
|                              | Germany         | 0.007 | 0.013    | 137   | 300      | 0.54 | 0.11-2.58  | 0.45                                                                    |
|                              | Greece          | 0.028 | 0.003    | 53    | 159      | 9.48 | 0.96-93.19 | 0.05                                                                    |
|                              | Italy           | 0     | 0.006    | 114   | 249      | N/A  | N/A        | N/A                                                                     |
|                              | The Netherlands | 0.014 | 0.009    | 107   | 225      | 1.59 | 0.35-7.25  | 0.55                                                                    |
|                              | Norway          | 0.036 | 0        | 14    | 27       | N/A  | N/A        | N/A                                                                     |
|                              | Poland          | 0.006 | 0.003    | 808   | 1,035    | 1.65 | 0.61-4.46  | 0.32                                                                    |
|                              | Russia          | 0.009 | 0.004    | 1,039 | 2,046    | 2.36 | 1.21-4.61  | 0.01                                                                    |
|                              | Spain           | 0.013 | 0.002    | 112   | 235      | 6.44 | 0.66-62.62 | 0.11                                                                    |
|                              | Sweden          | 0.01  | 0.009    | 51    | 113      | 1.11 | 0.10-12.53 | 0.93                                                                    |
|                              | UK              | 0.01  | 0.011    | 153   | 330      | 0.92 | 0.24-3.62  | 0.90                                                                    |
| Toronto                      | Canada          | 0.012 | 0.006    | 1,084 | 966      | 1.86 | 0.91-3.77  | 0.09                                                                    |
| UK                           | UK              | 0.016 | 0.008    | 2,448 | 2,989    | 2.13 | 1.47-3.09  | 6.60×10 <sup>-5</sup>                                                   |
| Heidelberg-EPIC              | Germany         | 0.014 | 0.006    | 1,362 | 1,253    | 2.29 | 1.23-4.26  | 8.80×10 <sup>-3</sup>                                                   |
| FE Model for Subgroup        |                 |       |          |       |          | 2.00 | 1.58-2.54  | 1.05×10 <sup>-8</sup><br>P <sub>het</sub> =0.73; I <sup>2</sup> =0%     |
| FE Model for All Studies     |                 |       |          |       |          | 1.84 | 1.60-2.10  | 1.84×10 <sup>-18</sup><br>P <sub>het</sub> =0.58; I <sup>2</sup> =0%    |

**b) CHEK2-I157T (rs17879961) and risk of all lung cancer**

(Data for directly genotyped samples in the GWAS discovery phase shown in parentheses)

| Study                        | Country         | EAF              |                  | Size         |              | OR             | 95% CI                     | P                                                                                  |
|------------------------------|-----------------|------------------|------------------|--------------|--------------|----------------|----------------------------|------------------------------------------------------------------------------------|
|                              |                 | Cases            | Controls         | Cases        | Controls     |                |                            |                                                                                    |
| <b>Discovery</b>             |                 |                  |                  |              |              |                |                            |                                                                                    |
| IARC                         | Romania         | 0.002<br>(0.007) | 0.006<br>(0)     | 75<br>(75)   | 116<br>(90)  | 0.18<br>-      | 0.00-62.25<br>-            | 0.57<br>(0.45)                                                                     |
|                              | Hungary         | 0.016<br>(0.014) | 0.037<br>(0.032) | 223<br>(220) | 219<br>(216) | 0.35<br>(0.41) | 0.13-0.92<br>(0.15-1.10)   | 0.04<br>(0.08)                                                                     |
|                              | Poland          | 0.019<br>(0.014) | 0.031<br>(0.030) | 543<br>(524) | 635<br>(582) | 0.52<br>(0.46) | 0.29-0.94<br>(0.25-0.86)   | 0.03<br>(0.01)                                                                     |
|                              | Russia          | 0.016<br>(0.013) | 0.043<br>(0.038) | 318<br>(309) | 622<br>(602) | 0.31<br>(0.31) | 0.15-0.64<br>(0.14-0.66)   | 1.57×10 <sup>-3</sup><br>(2.54×10 <sup>-3</sup> )                                  |
|                              | Slovakia        | 0.009<br>(0.004) | 0.004<br>(0.003) | 273<br>(265) | 156<br>(151) | 4.92<br>(1.07) | 0.35-68.37<br>(0.10-11.98) | 0.24<br>(0.95)                                                                     |
|                              | Czech Republic  | 0.013<br>(0.007) | 0.018<br>(0.014) | 164<br>(153) | 379<br>(361) | 0.66<br>(0.49) | 0.20-2.20<br>(0.11-2.29)   | 0.50<br>(0.37)                                                                     |
|                              | France          | 0                | 0.004            | 127          | 144          | -              | -                          | -                                                                                  |
|                              | USA             | 0.004            | 0.005            | 362          | 354          | 0.77           | 0.13-4.62                  | 0.77                                                                               |
|                              | Norway          | 0.016            | 0.021            | 342          | 343          | 0.31           | 0.10-0.93                  | 0.04                                                                               |
|                              | Estonia         | 0.04             | 0.046            | 106          | 823          | 0.84           | 0.40-1.75                  | 0.65                                                                               |
|                              | NCI             | Finland          | 0.021            | 0.038        | 1,732        | 1,270          | 0.52                       | 0.37-0.74                                                                          |
| Italy                        |                 | 0.001            | 0.004            | 1,917        | 1,978        | 0.32           | 0.11-0.96                  | 0.04                                                                               |
| USA                          |                 | 0.003            | 0.006            | 2,064        | 2,488        | 0.56           | 0.27-1.15                  | 0.12                                                                               |
| UK                           | UK              | 0.0004           | 0.0018           | 1,952        | 5,200        | 0.34           | 0.12-0.95                  | 0.04                                                                               |
| USA                          | MDACC           | 0.004            | 0.0039           | 1,150        | 1,134        | 1.05           | 0.35-3.09                  | 0.94                                                                               |
| FE Model for Subgroup        |                 |                  |                  |              |              | 0.51           | 0.41-0.63                  | 2.96×10 <sup>-10</sup><br><i>P</i> <sub>het</sub> =0.59; <i>I</i> <sup>2</sup> =0% |
| <b>In silico replication</b> |                 |                  |                  |              |              |                |                            |                                                                                    |
| deCODE                       | Iceland         | 0.0021           | 0.0025           | 1,319        | 26,380       | 0.83           | 0.37-1.89                  | 0.66                                                                               |
| Harvard                      | USA             | 0.0006           | 0.0034           | 984          | 970          | 0.14           | 0.02-1.18                  | 0.07                                                                               |
| FE Model for Subgroup        |                 |                  |                  |              |              | 0.66           | 0.31-1.43                  | 0.29<br><i>P</i> <sub>het</sub> =0.12; <i>I</i> <sup>2</sup> =58%                  |
| <b>Direct replication</b>    |                 |                  |                  |              |              |                |                            |                                                                                    |
| IARC                         | Denmark         | 0.005            | 0.008            | 274          | 709          | 0.64           | 0.18-2.30                  | 0.49                                                                               |
|                              | France          | 0                | 0                | 24           | 43           | -              | -                          | -                                                                                  |
|                              | Germany         | 0.004            | 0.005            | 138          | 298          | 0.72           | 0.07-6.96                  | 0.78                                                                               |
|                              | Greece          | 0                | 0.006            | 56           | 165          | -              | -                          | -                                                                                  |
|                              | Italy           | 0                | 0                | 117          | 251          | -              | -                          | -                                                                                  |
|                              | The Netherlands | 0                | 0.002            | 105          | 226          | -              | -                          | -                                                                                  |
|                              | Norway          | 0                | 0                | 15           | 29           | -              | -                          | -                                                                                  |
|                              | Poland          | 0.015            | 0.026            | 777          | 914          | 0.58           | 0.35-0.95                  | 0.03                                                                               |
|                              | Russia          | 0.024            | 0.027            | 1,034        | 2,030        | 0.86           | 0.61-1.21                  | 0.39                                                                               |
|                              | Spain           | 0                | 0                | 108          | 227          | -              | -                          | -                                                                                  |
|                              | Sweden          | 0                | 0                | 56           | 118          | -              | -                          | -                                                                                  |
|                              | UK              | 0                | 0                | 157          | 330          | -              | -                          | -                                                                                  |
|                              | Toronto         | Canada           | 0.003            | 0.005        | 1,084        | 966            | 0.63                       | 0.22-1.82                                                                          |
| UK                           | UK              | 0.008            | 0.005            | 2,448        | 2,989        | 1.63           | 0.36-7.30                  | 0.52                                                                               |
| Heidelberg-EPIC              | Germany         | 0.005            | 0.006            | 1,365        | 1,180        | 0.8            | 0.38-1.68                  | 0.55                                                                               |
| FE Model for Subgroup        |                 |                  |                  |              |              | 0.77           | 0.60-0.98                  | 0.03<br><i>P</i> <sub>het</sub> =0.83; <i>I</i> <sup>2</sup> =0%                   |
| FE Model for All Studies     |                 |                  |                  |              |              | 0.61           | 0.52-0.71                  | 3.86×10 <sup>-10</sup><br><i>P</i> <sub>het</sub> =0.43; <i>I</i> <sup>2</sup> =3% |

**c) CHEK2-I157T (rs17879961) and risk of squamous cell lung cancer using directly genotyped samples**

| Study                     | Country         | EAF   |                    | Size  |          | OR   | 95% CI     | P*                                                                   |
|---------------------------|-----------------|-------|--------------------|-------|----------|------|------------|----------------------------------------------------------------------|
|                           |                 | Cases | Controls           | Cases | Controls |      |            |                                                                      |
| <b>Discovery</b>          |                 |       |                    |       |          |      |            |                                                                      |
| IARC                      | Romania         | 0.031 | 0                  | 16    | 90       | -    | -          | 0.15                                                                 |
|                           | Hungary         | 0.011 | 0.032              | 88    | 216      | 0.35 | 0.04-1.55  | 0.26                                                                 |
|                           | Poland          | 0.003 | 0.030              | 186   | 582      | 0.09 | 0.00-0.54  | 1.10x10 <sup>-3</sup>                                                |
|                           | Russia          | 0.005 | 0.038              | 188   | 600      | 0.14 | 0.02-0.54  | 7.06x10 <sup>-4</sup>                                                |
|                           | Slovakia        | 0.004 | 0.003              | 124   | 151      | 1.22 | 0.02-95.83 | 1.00                                                                 |
|                           | Czech Republic  | 0     | 0.014              | 70    | 361      | -    | -          | 0.38                                                                 |
| FE Model for Subgroup     |                 |       |                    |       |          | 0.17 | 0.07-0.39  | 3.57x10 <sup>-5</sup><br>P <sub>het</sub> =0.34; I <sup>2</sup> =11% |
| <b>Direct replication</b> |                 |       |                    |       |          |      |            |                                                                      |
| IARC                      | Denmark         | 0.015 | 0.008              | 65    | 709      | 1.8  | 0.19-8.23  | 0.34                                                                 |
|                           | France          | -     | 0                  | 0     | 43       | -    | -          | -                                                                    |
|                           | Germany         | 0     | 0.005              | 26    | 298      | -    | -          | -                                                                    |
|                           | Greece          | 0     | 0.006              | 12    | 165      | -    | -          | -                                                                    |
|                           | Italy           | 0     | 0                  | 26    | 251      | -    | -          | -                                                                    |
|                           | The Netherlands | 0     | 0.002              | 20    | 226      | -    | -          | -                                                                    |
|                           | Norway          | 0     | 0                  | 1     | 29       | -    | -          | -                                                                    |
|                           | Poland          | 0.005 | 0.026              | 318   | 914      | 0.18 | 0.04-0.56  | 4.94x10 <sup>-4</sup>                                                |
|                           | Russia          | 0.013 | 0.027              | 496   | 2,030    | 0.48 | 0.25-0.86  | 0.01                                                                 |
|                           | Spain           | 0     | 0                  | 28    | 227      | -    | -          | -                                                                    |
|                           | Sweden          | 0     | 0                  | 16    | 118      | -    | -          | -                                                                    |
|                           | UK              | 0     | 0                  | 55    | 330      | -    | -          | -                                                                    |
| Toronto                   | Canada          | 0.002 | 0.005              | 205   | 966      | 0.52 | 0.01-3.79  | 1.00                                                                 |
| UK                        | UK              | 0.001 | 5x10 <sup>-4</sup> | 1,043 | 2,989    | 1.9  | 0.16-16.57 | 0.61                                                                 |
| Heidelberg-EPIC           | Germany         | 0.003 | 0.006              | 345   | 1,180    | 0.48 | 0.05-2.09  | 0.55                                                                 |
| FE Model for Subgroup     |                 |       |                    |       |          | 0.44 | 0.29-0.68  | 2.16x10 <sup>-4</sup><br>P <sub>het</sub> =0.13; I <sup>2</sup> =41% |
| FE Model for All Studies  |                 |       |                    |       |          | 0.34 | 0.23-0.50  | 3.52x10 <sup>-8</sup><br>P <sub>het</sub> =0.08; I <sup>2</sup> =42% |

\* P-values and CIs for individual associations from Fishers exact test (two-sided)

**Supplementary Table 5: Relationship between K3326X, 999del5 genotypes and risk of breast, squamous cell head and neck, lung and ovarian cancer in the Icelandic population**

| <b>Variant</b> | <b>Cancer</b>                   | <b>OR</b> | <b>GC corrected P-value</b>   |
|----------------|---------------------------------|-----------|-------------------------------|
| K3326X         | Breast                          | 1.08      | 0.53                          |
| K3326X         | Head and neck (squamous)        | 1.12      | 0.72                          |
| K3326X         | Lung                            | 1.55      | <b>2.36x10<sup>-3</sup></b>   |
| K3326X         | Ovarian                         | 1.27      | 0.40                          |
| 999del5        | Breast                          | 13.15     | <b>1.37x10<sup>-109</sup></b> |
| 999del5        | Head and neck cancer (squamous) | 2.82      | <b>0.01</b>                   |
| 999del5        | Lung                            | 0.96      | 0.87                          |
| 999del5        | Ovarian                         | 9.60      | <b>4.47x10<sup>-19</sup></b>  |

39 of the 2,231 sequenced Icelandic individuals were carriers of the minor allele of K3326X

37 of the 2,231 sequenced Icelandic individuals were carriers of the minor allele of 999del5

None of the 2,231 sequenced Icelandic individuals carried both mutations



**Supplementary Table 6: (a) Frequency of somatic *BRCA2* and *CHEK2* mutations in lung cancer (Data derived from TCGA)**

|                      |                  | TCGA exome-sequencing data |                            |                                                            |                                                           | TCGA Affymetrix SNP 6.0 array data               |                                                                |
|----------------------|------------------|----------------------------|----------------------------|------------------------------------------------------------|-----------------------------------------------------------|--------------------------------------------------|----------------------------------------------------------------|
| Gene variant         | Tumour histology | Total number of tumours    | Number of variant carriers | Number of tumours with SNV in respective gene <sup>1</sup> | Number of tumours with a somatic INDEL in respective gene | Number of tumours showing CNA in respective gene | Number of gene carriers with a somatic second hit <sup>2</sup> |
| <i>BRCA2</i> -K3326X | SQ (LUSC)        | 243                        | 13                         | 13                                                         | 0                                                         | 25 (25 loss)                                     | 2                                                              |
|                      | AD (LUAD)        | 338                        | 11                         | 18                                                         | 0                                                         | 19 (4 gain, 16 loss)                             | 0                                                              |
| <i>CHEK2</i> -I157T  | SQ (LUSC)        | 243                        | 2                          | 11                                                         | 0                                                         | 35 (31 gain, 4 loss)                             | 0                                                              |
|                      | AD (LUAD)        | 338                        | 3                          | 16                                                         | 0                                                         | 11 (3 gain, 8 loss)                              | 0                                                              |

SNV=single nucleotide variant; INDEL= insertion/deletion; CNA= copy number alteration

<sup>1</sup>Mutect, exonic mutations, deleterious or missense

<sup>2</sup> Somatic mutation in tumours defined by SNV, INDEL or CNA

**Supplementary Table 6: (b) genomic annotation of TP63 by HaploReg v2 and RegulomeDB.** Data are shown for rs13314271 (3q28 TP63) and proxy SNPs ( $r^2 > 0.8$  in 1000 Genomes EUR phase 1 data) demonstrating evidence of histone marks, DNase hypersensitivity sites or transcription factor occupancy in RegulomeDB analysis. Also indicated are GERP scores  $> 2$  and RegulomeDB scores for all SNPs.

| SNP               | Chr      | Pos (hg19)       | LD <sup>a</sup> |          | EUR freq    | GERP score <sup>b</sup> | Enhancer histone marks | DNase HS      | Proteins bound | Motifs changed | GENCODE genes   | dbSNP annotation | Regulome DB score |   |
|-------------------|----------|------------------|-----------------|----------|-------------|-------------------------|------------------------|---------------|----------------|----------------|-----------------|------------------|-------------------|---|
| rs36108040        | 3        | 189335844        | 0.95            | 0.98     | 0.49        |                         |                        |               |                | 1              | 13kb 5' of TP63 |                  | No Data           |   |
| rs55779747        | 3        | 189354127        | 0.99            | 0.99     | 0.49        |                         |                        | H1            | WERI-Rb-1      | 5              | TP63            | intronic         | 5                 |   |
| rs4488809         | 3        | 189356261        | 0.98            | 0.99     | 0.49        |                         |                        | GM12878       | GM12864        | 8              | TP63            | intronic         | 5                 |   |
| rs7636839         | 3        | 189356941        | 0.99            | 0.99     | 0.49        | 2.92                    |                        | GM12878       |                | 4              | TP63            | intronic         | 6                 |   |
| rs13080835        | 3        | 189357199        | 1               | 1        | 0.49        |                         |                        | GM12878       | GM06990        | 5              | TP63            | intronic         | 5                 |   |
| <b>rs13314271</b> | <b>3</b> | <b>189357602</b> | <b>1</b>        | <b>1</b> | <b>0.49</b> |                         |                        |               |                | <b>4</b>       | <b>TP63</b>     | <b>intronic</b>  | <b>No Data</b>    |   |
| rs12696594        | 3        | 189357616        | 1               | 1        | 0.49        |                         |                        |               |                | 5              | TP63            | intronic         | 6                 |   |
| rs55862124        | 3        | 189359836        | 0.99            | 0.99     | 0.49        |                         |                        | GM12878, HMEC | 4 cell types   | ERALPHA_A      | 4               | TP63             | intronic          | 4 |
| rs7619517         | 3        | 189360235        | 0.99            | 0.99     | 0.49        |                         |                        |               |                |                | TP63            | intronic         | No Data           |   |
| rs7629983         | 3        | 189360406        | 0.98            | 0.99     | 0.49        |                         |                        |               |                | 6              | TP63            | intronic         | No Data           |   |
| rs13084874        | 3        | 189361400        | 0.98            | 0.99     | 0.49        |                         |                        |               |                |                | TP63            | intronic         | No Data           |   |
| rs9811174         | 3        | 189366595        | 0.8             | 0.98     | 0.46        |                         |                        |               |                | 4              | TP63            | intronic         | 6                 |   |
| rs9811214         | 3        | 189366763        | 0.8             | 0.98     | 0.46        |                         |                        |               |                | 2              | TP63            | intronic         | No Data           |   |
| rs9821164         | 3        | 189368255        | 0.8             | 0.98     | 0.46        |                         |                        |               |                | 4              | TP63            | intronic         | 6                 |   |
| rs4426661         | 3        | 189368357        | 0.8             | 0.98     | 0.46        |                         |                        |               |                | 3              | TP63            | intronic         | 6                 |   |
| rs1920272         | 3        | 189378556        | 0.96            | 0.98     | 0.49        |                         |                        | GM12878       |                |                | TP63            | intronic         | No Data           |   |

Chr, chromosome; DNase HS, DNase hypersensitivity; Freq, frequency; GERP, Genomic Evolutionary Rate Profiling; LD, linkage disequilibrium; Pos, position;

<sup>a</sup> LD ( $r^2$ ) is based upon 1000 Genomes EUR data and a threshold of  $r^2 > 0.8$  was imposed to identify correlated SNPs

<sup>b</sup> GERP scores indicative of evolutionary constraint ( $> 2$ ) are listed

<sup>d</sup> RegulomeDB scores: 4, TF binding + DNase peak; 5, TF binding or DNase peak; 6, other binding or DNase peak.

**Supplementary Table 7: Relationship between rs11571833 (*BRCA2* K3326X), rs17879961 (*CHEK2* I157T) and rs13314271 (*TP63*) genotype and cigarette consumption. Analysis based on data from 43,693 Icelandic subjects (including 34,850 chip typed individuals).**

| Variant             | Minor allele | Other allele | MAF in Icelandic population | MAF in CEU | Info score | Genomic control corrected <i>P</i> -value |
|---------------------|--------------|--------------|-----------------------------|------------|------------|-------------------------------------------|
| <b><i>BRCA2</i></b> |              |              |                             |            |            |                                           |
| rs11571833          | T            | A            | 1.04%                       | 1.05%      | 1.00       | 0.62                                      |
| <b><i>CHEK2</i></b> |              |              |                             |            |            |                                           |
| rs17879961          | G            | A            | 0.66%                       | 0.51%      | 0.51       | 0.59                                      |
| <b><i>TP63</i></b>  |              |              |                             |            |            |                                           |
| rs13314271          | T            | C            | 48.95%                      | 48.95%     | 1.00       | 0.81                                      |

Imputation of variants was performed using 2,231 long range phased whole-genome sequenced Icelandic individuals (Kong A, *et al.*, Nature 2009, 462:868; Styrkarsdottir U, *et al.*, Nature 2013, 497:517).
